# Supplementary material for: Exact replication: Foundation of science or game of chance?
Source: PLoS Biol. 2019 Apr 9;17(4):e3000188. doi: 10.1371/journal.pbio.3000188 (PMC6456162; doi:10.1371/journal.pbio.3000188)
Supplement: S1 Data — (XLSX) [file pbio.3000188.s002.xlsx]

## Sheet: Fig1
effect size	power (N=10)	power (N=25)	power (N=50)
-0.10	0.06	0.06	0.08
0.00	0.05	0.05	0.05
0.10	0.06	0.06	0.08
0.20	0.07	0.11	0.17
0.30	0.10	0.18	0.32
0.40	0.14	0.28	0.51
0.50	0.19	0.41	0.70
0.60	0.25	0.55	0.84
0.70	0.32	0.68	0.93
0.80	0.40	0.79	0.98
0.90	0.48	0.88	0.99
1.00	0.56	0.93	1.00
1.10	0.64	0.97	1.00
1.20	0.72	0.99	1.00
1.30	0.78	0.99	1.00
1.40	0.84	1.00	1.00
1.50	0.89	1.00	1.00
1.60	0.92	1.00	1.00
1.70	0.95	1.00	1.00
1.80	0.97	1.00	1.00
1.90	0.98	1.00	1.00
2.00	0.99	1.00	1.00
2.10	0.99	1.00	1.00

## Sheet: S1 Fig
Control	Valproate 30mg
76.76	43.49
70.42	6.38
63.43	22.34
22.81	17.04
60.78	42.71
67.85	7.56
92.45	88.80
81.56	70.32
25.34	62.19
74.64	33.59
